# Supplementary material for: Phenotypic recapitulation and correction of desmoglein-2-deficient cardiomyopathy using human-induced pluripotent stem cell-derived cardiomyocytes
Source: PubMed Central journal article supplement (PMC8283207; doi:10.1093/hmg/ddab127), 2021-05-05

A

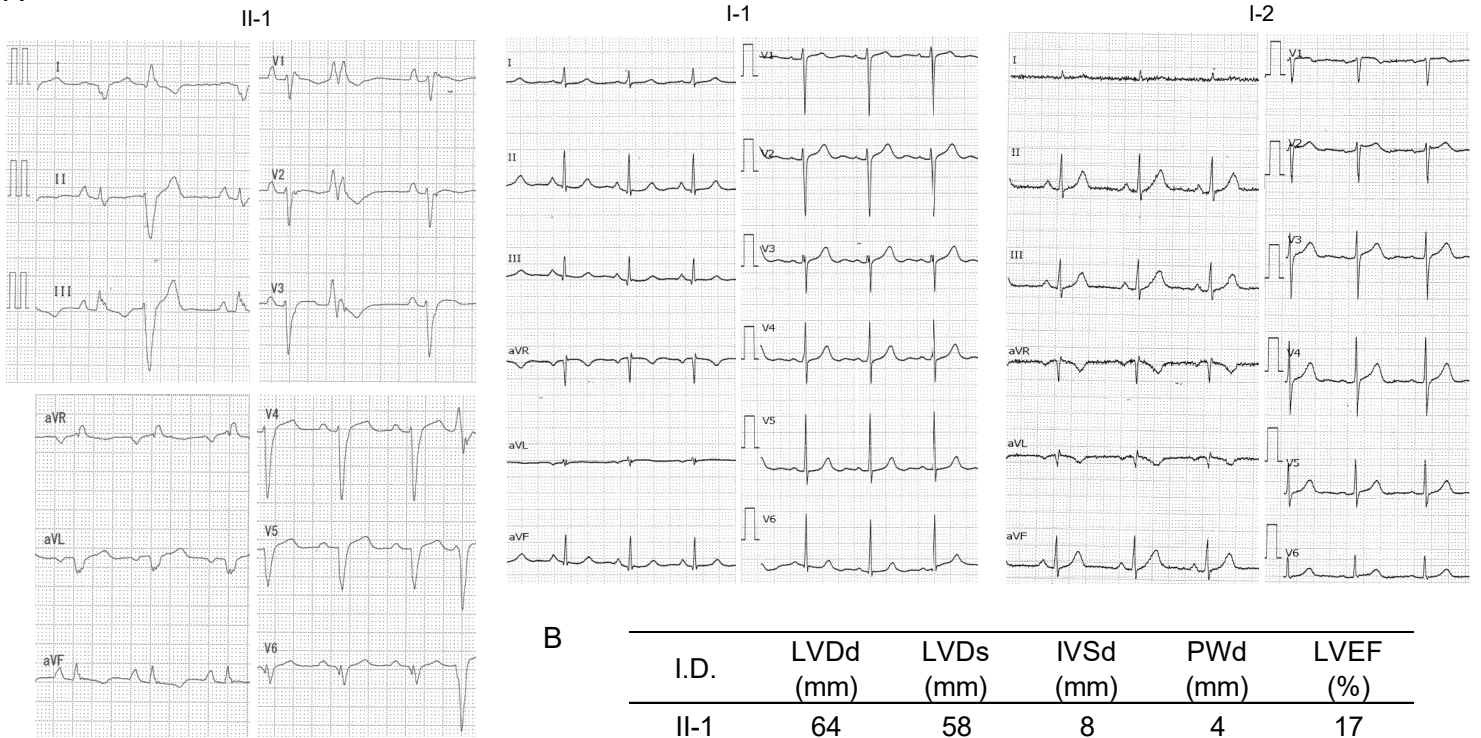

B

| I.D. | LVDd<br>(mm) | LVDs<br>(mm) | IVSd<br>(mm) | PWd<br>(mm) | LVEF<br>(%) |
|------|--------------|--------------|--------------|-------------|-------------|
| II-1 | 64           | 58           | 8            | 4           | 17          |
| I-1  | 48           | 28           | 7            | 8           | 67          |
| I-2  | 42           | 25           | 7            | 7           | 66          |

C

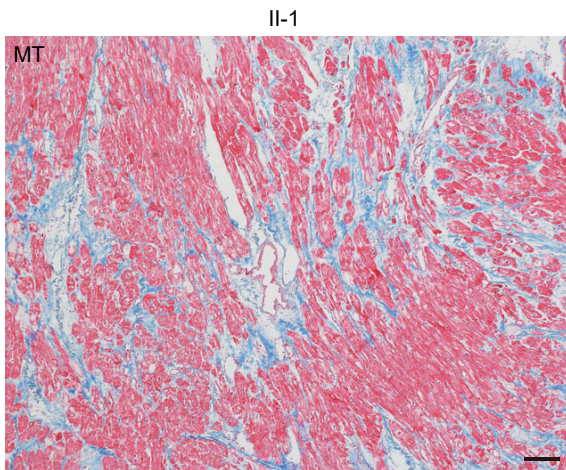

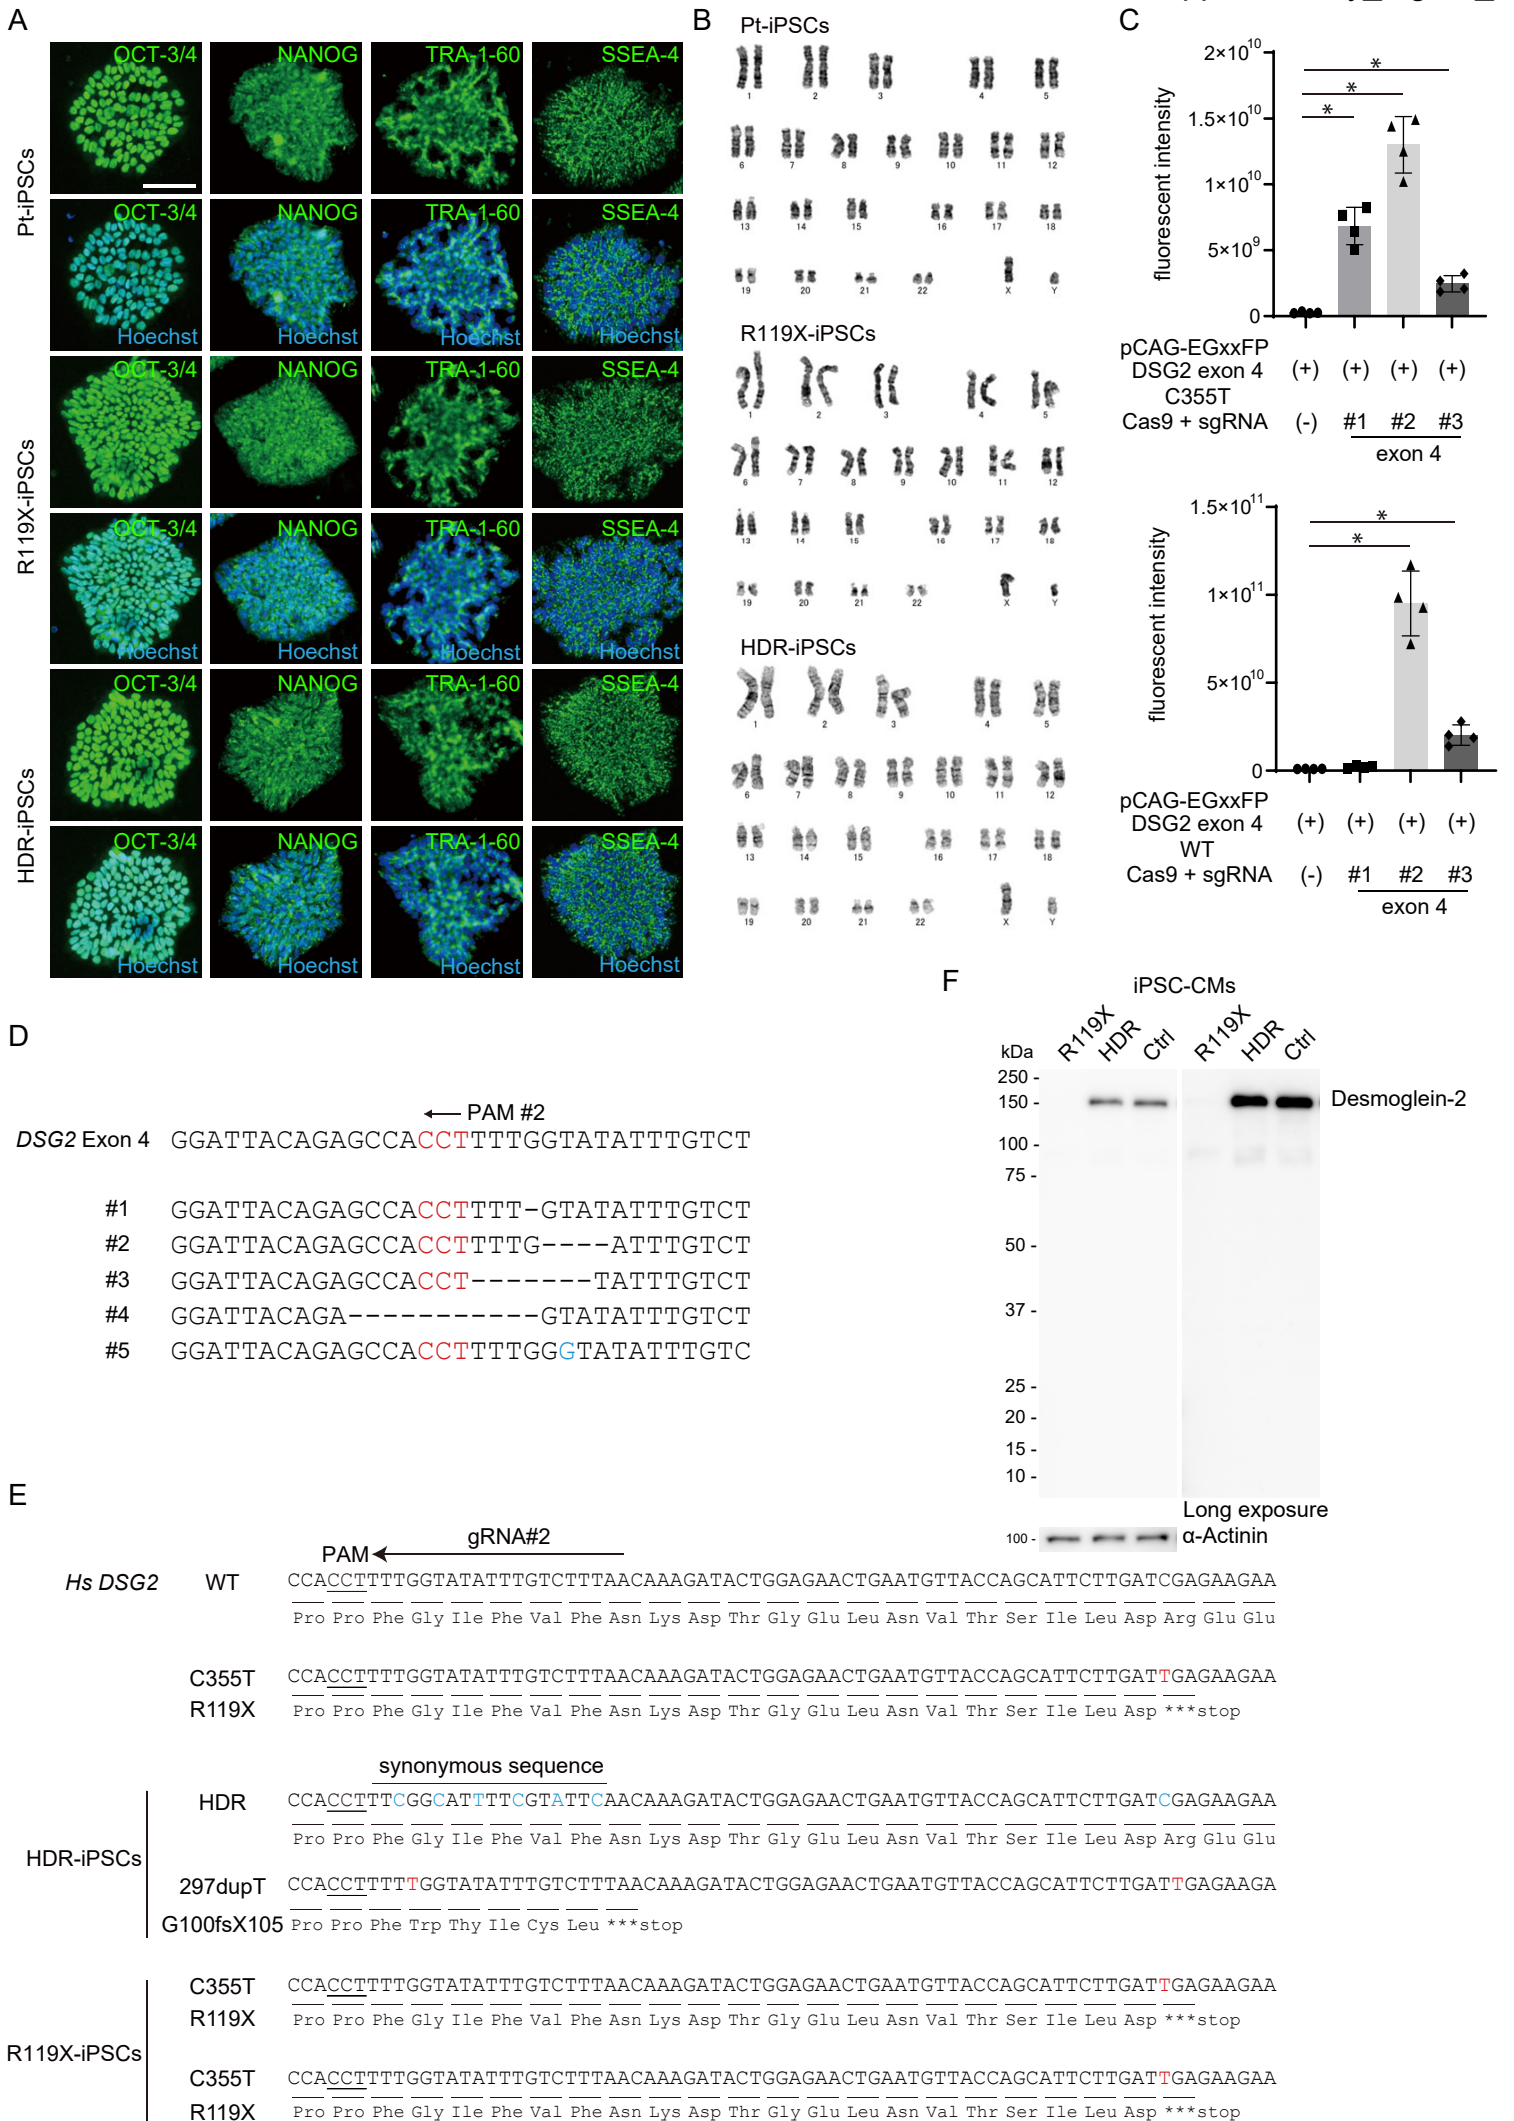

A

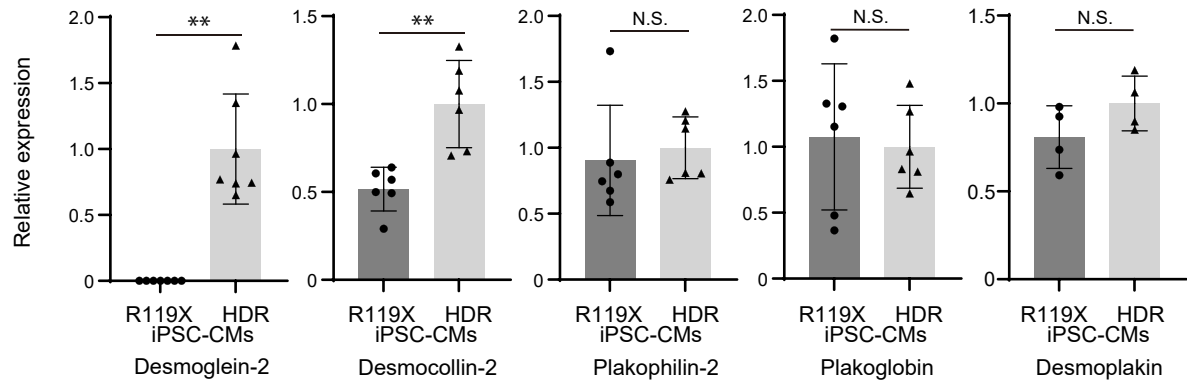

B

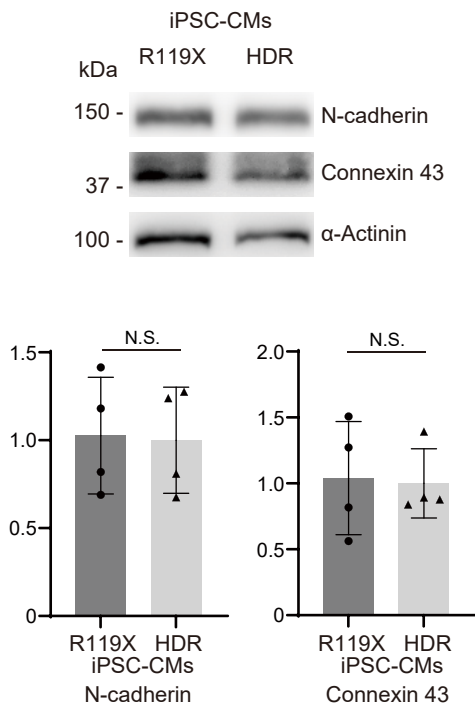

C

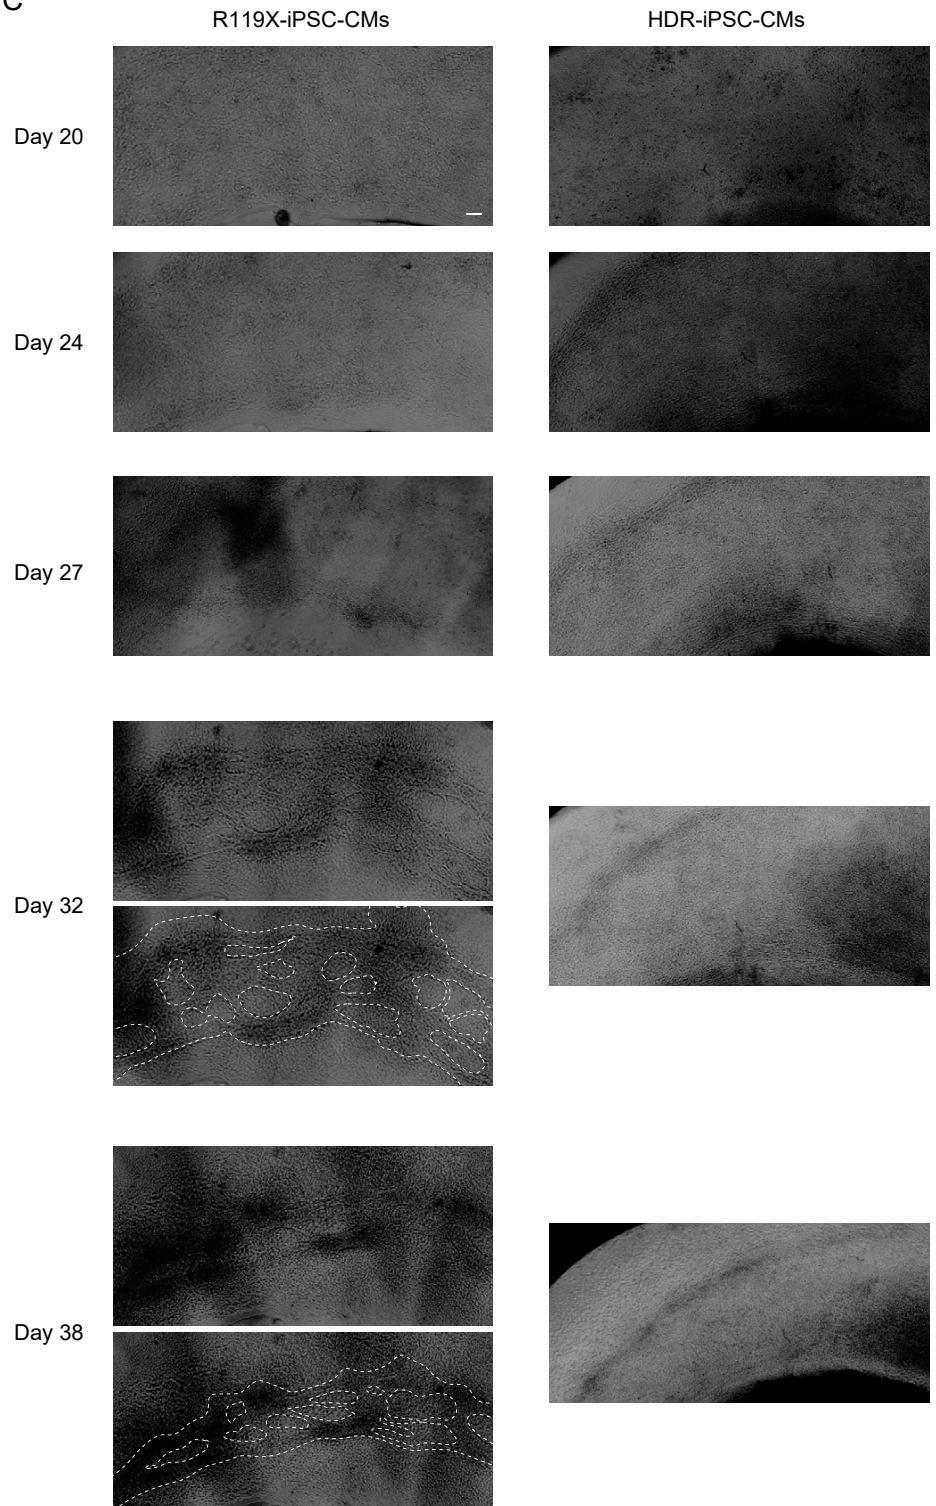

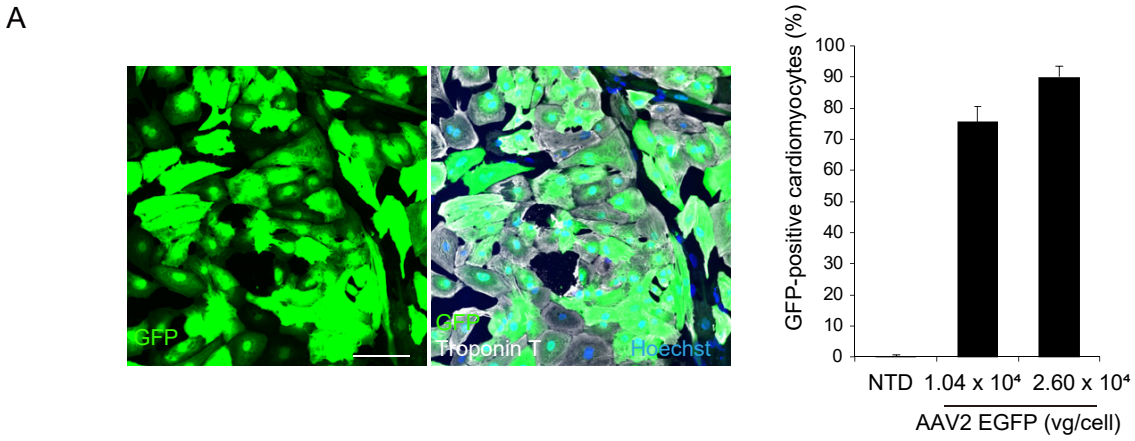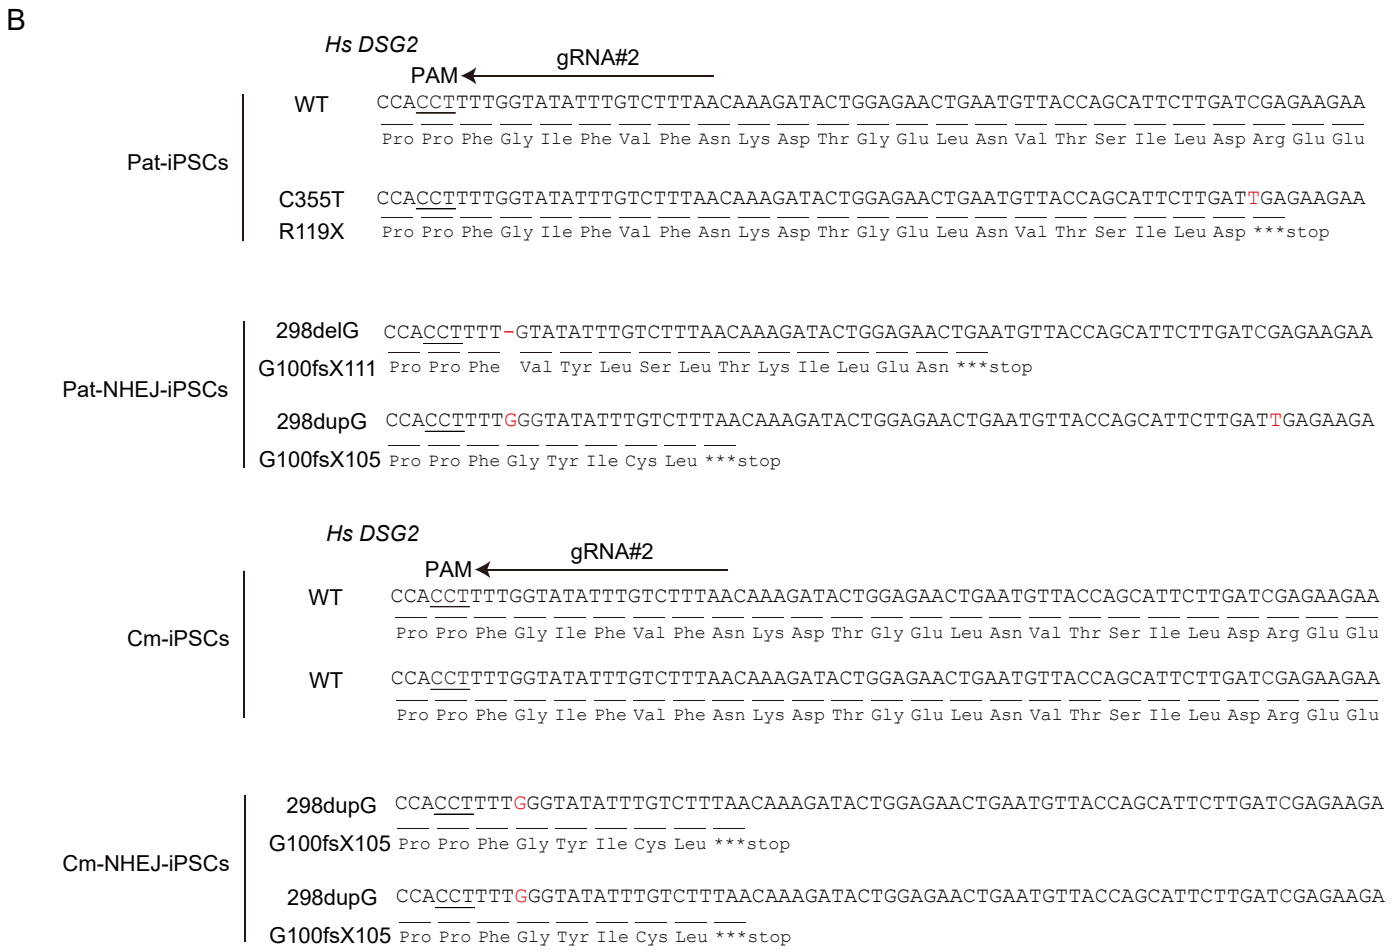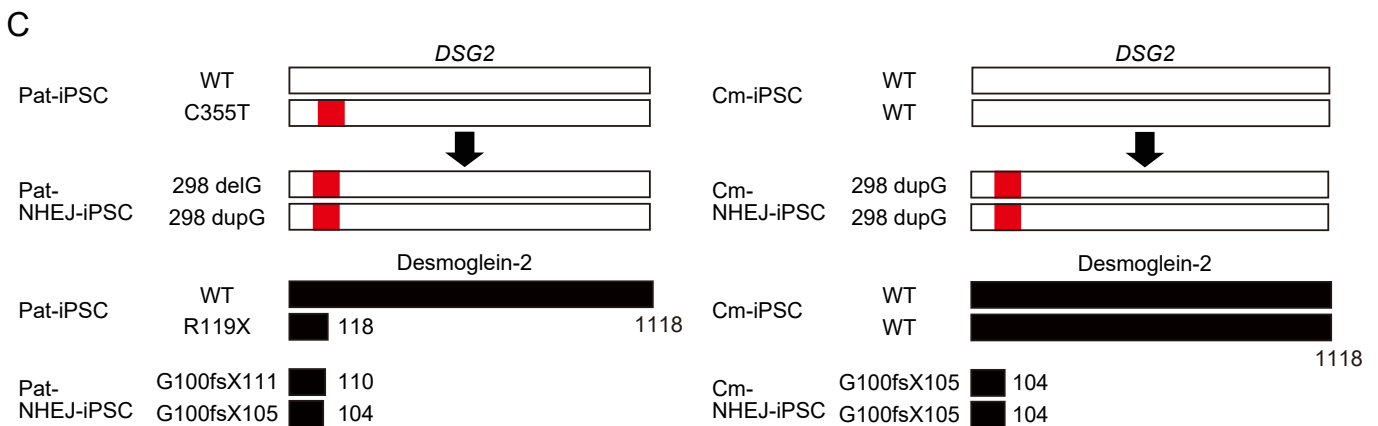

A

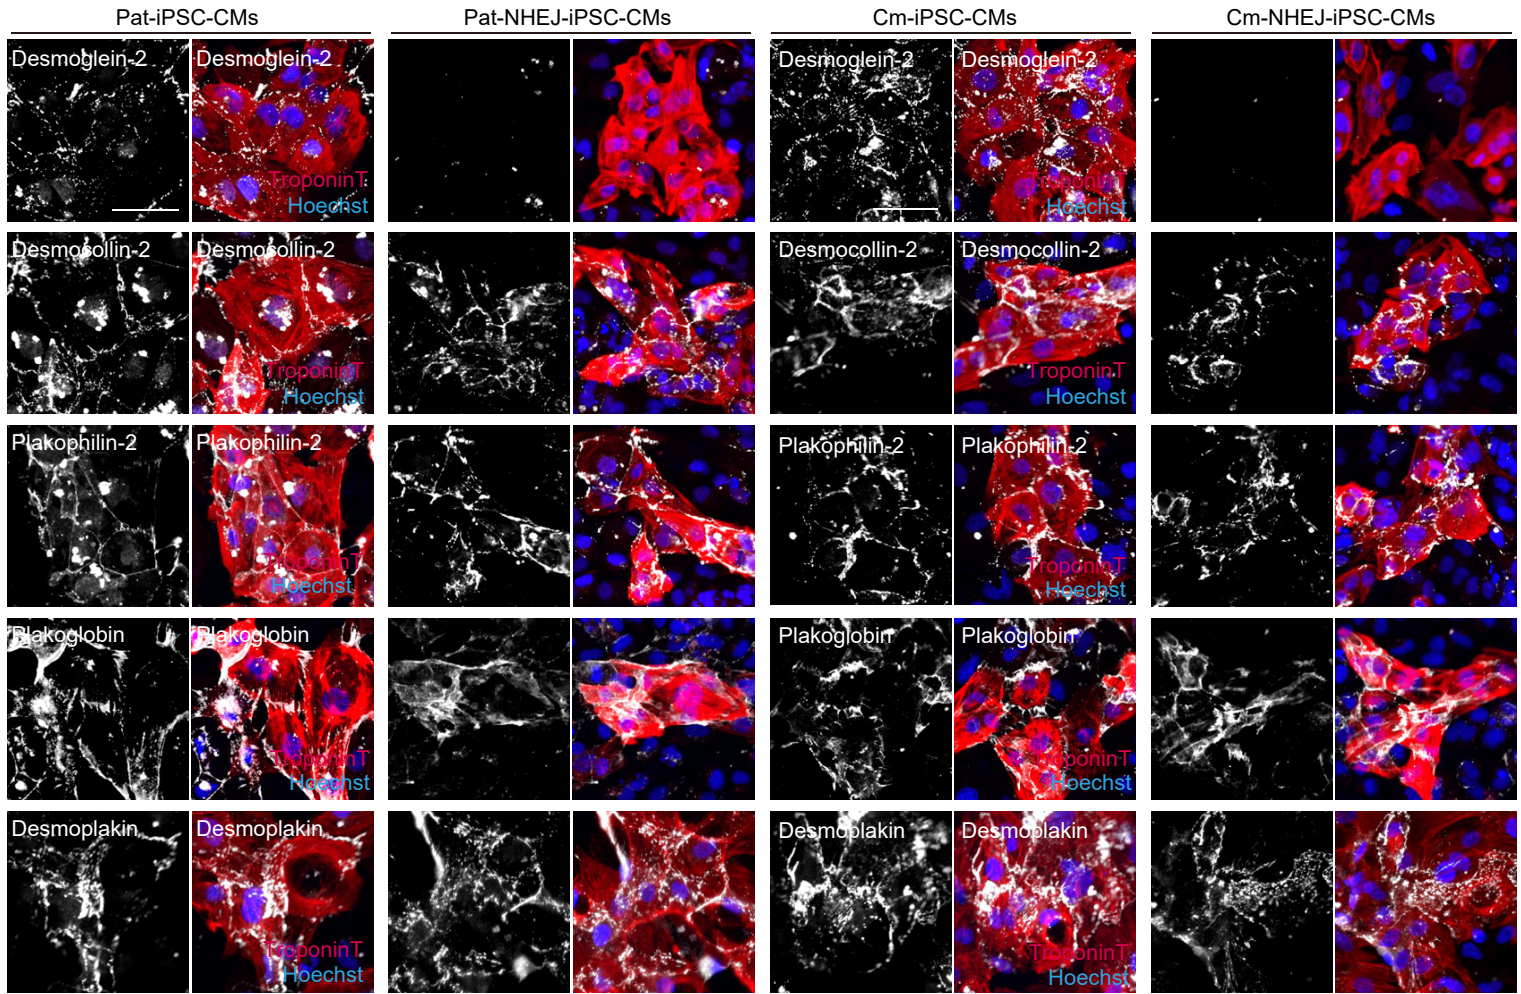

B

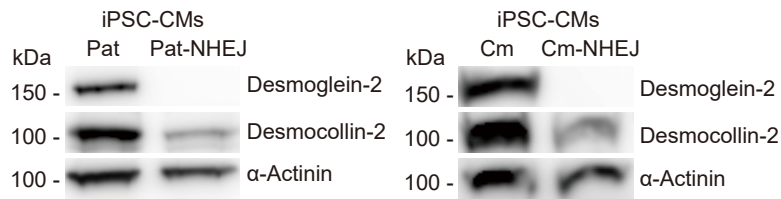

Supplement: supplementary_figure_hmg-2021-ce-00080_shiba_ddab127.pdf [file supplementary_figure_hmg-2021-ce-00080_shiba_ddab127.pdf]
